# Supplementary material for: Enhancement of Mechanical Properties of Multilayer Ceramic Capacitors through a BaTiO3/polydopamine Cover Layer
Source: MDPI journal article supplement (doi:10.3390/polym15194014), 2023-10-07
Supplement: s1 [file s1]

# Supplementary Information

## **Enhancement of Mechanical Properties of Multilayer Ceramic Capacitors through a BaTiO<sub>3</sub>/polydopamine Cover Layer**

Yong Park <sup>1,†</sup>, Jung Jin Park <sup>1,†</sup>, Kwan Soo Park <sup>1</sup>, Yong Min Hong <sup>1</sup>, Eun Jung Lee <sup>1</sup>, Sang Ouk Kim <sup>2</sup>, and Jong Ho Lee <sup>1,\*</sup>

<sup>1</sup>MLCC Green Chip Lab, MLCC Development Team, Component Business Unit, Samsung Electro-Mechanics 150 Maeyoung-ro, Yeongtong-gu, Suwon-si, Gyeonggi-do, 16674, Republic of Korea

<sup>2</sup>National Creative Research Initiative Center for Multi-Dimensional Directed Nanoscale Assembly, Department of Materials Science and Engineering, KAIST, Daejeon 34141, Republic of Korea

\*Correspondence: [jh205.lee@samsung.com](mailto:jh205.lee@samsung.com)

<sup>†</sup>These authors have contributed equally to this work.

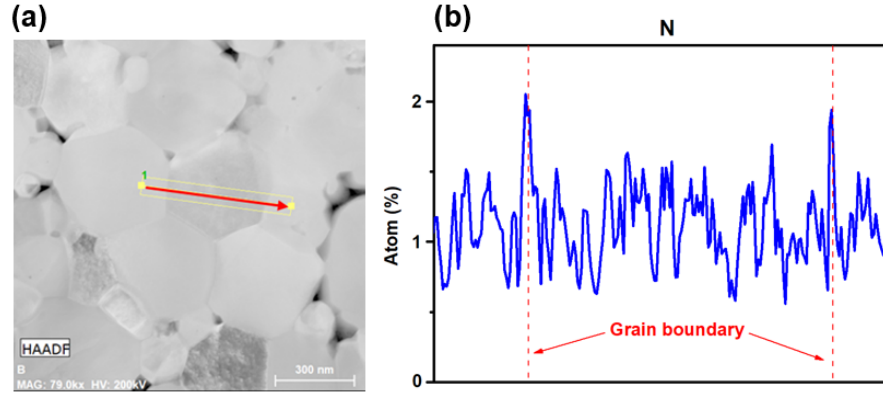

**Figure S1.** (a) TEM image of BT/PDA layer after firing. (b) N atomic percent by line profile. The line profile represents a higher atomic percent of N at the grain boundary.

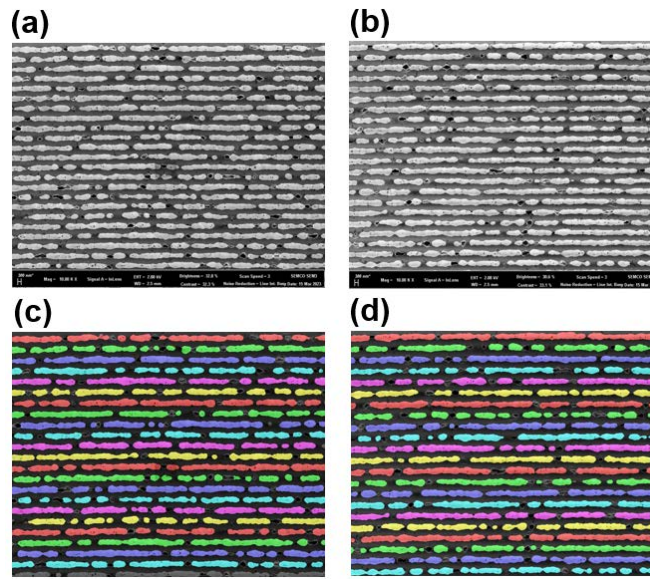

**Figure S2.** SEM image of (a) BT and (b) BT/PDA internal MLCC layer. Electrode connection of (c) BT and (d) BT/PDA internal MLCC layer. The internal MLCC layers of BT and BT/PDA are the same, except for the cover layer. The porosity of dielectric layer for the BT and BT/PDA was at the same level. When the perfect electrode connectivity is assumed as 100 %, the calculated electrode connectivity of BT is 85 %, and that of BT/PDA is 86 %.
